# Supplementary material
Source: Springer Nature journal article supplement (https://www.springermedizin.de/resource/supplementary/12974_2011_457_MOESM6_ESM.pdf/9601354)

**A****Microglia**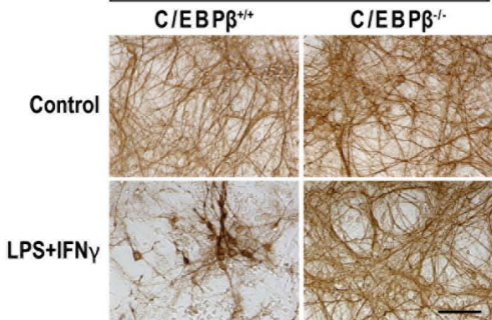**B****Neuronal viability**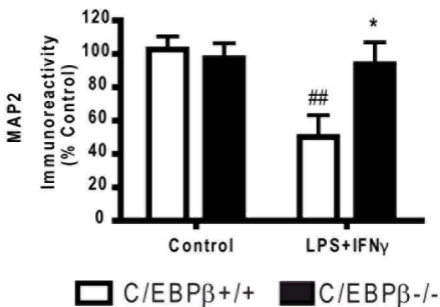

Supplement: MOESM6 [file 9601354]
